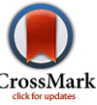

## Correction

# Correction: Evidence that HIV-1 CRF01\_AE is Associated with Low CD4+T Cell Count and CXCR4 Co-receptor Usage in Recently Infected Young Men Who Have Sex with Men (MSM) in Shanghai, China

## The PLOS ONE Staff

There were errors in the Funding section. The correct funding statement is as follows: “This work was supported by the National Science and Technology Major Project for Infectious Disease Control and Prevention (2012-ZX10001-002) and National Natural Science Foundation of China (81373060). The funders had no role in study design, data collection and analysis, decision to publish, or preparation of the manuscript.”

The fourth column header in the first line of Table 1 is incorrect. The correct header is: Subtype B (%).

## Reference

1. Li X, Xue Y, Zhou L, Lin Y, Yu X, et al. (2014) Evidence That HIV-1 CRF01\_AE Is Associated with Low CD4+T Cell Count and CXCR4 Co-Receptor Usage in Recently Infected Young Men Who Have Sex with Men (MSM) in Shanghai, China. PLoS ONE 9(2): e89462. doi:10.1371/journal.pone.0089462

**Citation:** The PLOS ONE Staff (2014) Correction: Evidence that HIV-1 CRF01\_AE is Associated with Low CD4+T Cell Count and CXCR4 Co-receptor Usage in Recently Infected Young Men Who Have Sex with Men (MSM) in Shanghai, China. PLoS ONE 9(5): e97395. doi:10.1371/journal.pone.0097395

**Published:** May 6, 2014

**Copyright:** © 2014 The PLOS ONE Staff. This is an open-access article distributed under the terms of the Creative Commons Attribution License, which permits unrestricted use, distribution, and reproduction in any medium, provided the original author and source are credited.
